# Supplementary material for: Absolute Binding Free Energy Calculations for Highly Flexible Protein MDM2 and Its Inhibitors
Source: PubMed Central journal article supplement (PMC7369993; doi:10.3390/ijms21134765), 2020-07-04

## Supplementary Information

### **Absolute Binding Free Energy Calculations for Highly Flexible Protein MDM2 and its inhibitors**

Nidhi Singh<sup>1,2</sup>, Wenjin Li<sup>1,\*</sup>

1 Institute for Advanced Study, Shenzhen University, Shenzhen 518060, China

2 College of Physics and Optoelectronic Engineering, Shenzhen University, Shenzhen 518060, China

\*Correspondent:

Wenjin Li, Room 341, Administration Building, Institute for Advanced Study, Shenzhen University, Shenzhen 518060, China; E-mail: liwenjin@szu.edu.cn; Tel: +86-755-26942336

#### **S1: The lambda points used for the transformation of system**

(a) For decoupling ligand from solution

coul-lambdas = 0.0 0.25 0.5 0.75 1.0 1.00 1.0 1.0 1.0 1.0 1.0 1.00 1.0 1.00 1.0 1.00 1.0 1.00  
1.0

vdw-lambdas = 0.0 0.00 0.0 0.00 0.0 0.05 0.1 0.2 0.3 0.4 0.5 0.6 0.65 0.7 0.75 0.8 0.85 0.9 0.95  
1.0

(b) For Decoupling ligand from protein following lambda steps were followed:

bonded-lambdas = 0.0 0.01 0.025 0.05 0.075 0.1 0.2 0.35 0.5 0.75 1.0 1.00 1.0 1.00 1.0 1.00  
1.0 1.0 1.0 1.0 1.0 1.0 1.00 1.0 1.00 1.0 1.00 1.0 1.00 1.0 1.00 1.0

coul-lambdas = 0.0 0.00 0.000 0.00 0.000 0.0 0.0 0.00 0.0 0.00 0.0 0.25 0.5 0.75 1.0 1.00 1.0 1.0  
1.0 1.0 1.0 1.0 1.0 1.0 1.00 1.0 1.00 1.0 1.00 1.0 1.00 1.0

vdw-lambdas = 0.0 0.00 0.000 0.00 0.000 0.0 0.0 0.00 0.0 0.00 0.0 0.00 0.0 0.00 0.0 0.05 0.1  
0.2 0.3 0.4 0.5 0.6 0.65 0.7 0.75 0.8 0.85 0.9 0.95 1.0

**S2 Table 1: FEP based predicted binding free energy**

| complex | Production run (1 ns for each window) | Production run (2 ns for each window) |
|---------|---------------------------------------|---------------------------------------|
| 4JV7    | -14.56 ± 0.29                         | -14.86± 0.38                          |
| 4JV9    | -15.73 ± 0.29                         | -15.36±0.25                           |

**S3****Table 2: The extracted conformations for each complex and Rg, rmsd and Free Energy values**

| S.No | PDB         | Rg (nm)      | r.m.s.d (nm) | Free Energy (KJ/mol) | Average ± standard error of mean (KJ/mol/Kcal/mol) |
|------|-------------|--------------|--------------|----------------------|----------------------------------------------------|
| 1    | 3TJ2        | 1.211        | 0.192        | 3.24                 |                                                    |
|      |             | 1.220        | 0.187        | 5.66                 |                                                    |
|      |             | 1.213        | 0.184        | 4.04                 | 4.528±0.41/1.082±0.09                              |
|      |             | 1.206        | 0.177        | 4.85                 |                                                    |
|      |             | 1.207        | 0.176        | 4.85                 |                                                    |
| 2.   | <b>4JV7</b> | <b>1.225</b> | <b>0.189</b> | <b>5.66</b>          |                                                    |
|      |             | <b>1.222</b> | <b>0.184</b> | <b>5.66</b>          |                                                    |
|      |             | <b>1.213</b> | <b>0.186</b> | <b>4.04</b>          | <b>5.98±0.79/1.42±0.18</b>                         |
|      |             | <b>1.225</b> | <b>0.180</b> | <b>5.66</b>          |                                                    |
|      |             | <b>1.230</b> | <b>0.190</b> | <b>8.9</b>           |                                                    |
| 3.   | 4JV9        | 1.220        | 0.166        | 10.5                 |                                                    |
|      |             | 1.221        | 0.178        | 8.09                 |                                                    |

|    |             |              |              |             |                             |
|----|-------------|--------------|--------------|-------------|-----------------------------|
|    |             | 1.223        | 0.181        | 5.66        | 6.79±1.13/1.62±0.27         |
|    |             | 1.211        | 0.192        | 4.04        |                             |
|    |             | 1.223        | 0.192        | 5.66        |                             |
| 4. | <b>4MDN</b> | <b>1.212</b> | <b>0.168</b> | <b>4.04</b> |                             |
|    |             | <b>1.212</b> | <b>0.169</b> | <b>4.04</b> |                             |
|    |             | <b>1.208</b> | <b>0.167</b> | <b>4.85</b> | <b>5.012±0.78/1.19±0.18</b> |
|    |             | <b>1.213</b> | <b>0.167</b> | <b>4.04</b> |                             |
|    |             | <b>1.222</b> | <b>0.176</b> | <b>8.09</b> |                             |
| 5. | 4MDQ        | 1.239        | 0.195        | 8.9         |                             |
|    |             | 1.230        | 0.1902       | 8.9         |                             |
|    |             | 1.222        | 0.1839       | 5.66        | 6.956 ± 0.79/1.66±0.18      |
|    |             | 1.226        | 0.1820       | 5.66        |                             |
|    |             | 1.228        | 0.1975       | 5.66        |                             |
| 6. | <b>5LAV</b> | <b>1.206</b> | <b>0.205</b> | <b>4.04</b> |                             |
|    |             | <b>1.225</b> | <b>0.200</b> | <b>5.66</b> |                             |
|    |             | <b>1.220</b> | <b>0.201</b> | <b>5.66</b> | <b>4.85±0.36/1.15±0.08</b>  |
|    |             | <b>1.207</b> | <b>0.207</b> | <b>4.04</b> |                             |
|    |             | 1.207        | 0.212        | 4.85        |                             |
| 7. | 5LAW        | 1.211        | 0.202        | 4.04        |                             |
|    |             | 1.204        | 0.213        | 4.04        |                             |
|    |             | 1.199        | 0.200        | 4.85        | 4.202±0.16/1.00±0.03        |
|    |             | 1.205        | 0.205        | 4.04        |                             |
|    |             | 1.206        | 0.209        | 4.04        |                             |
| 8. | <b>5LAY</b> | <b>1.215</b> | <b>0.185</b> | <b>4.04</b> |                             |
|    |             | <b>1.215</b> | <b>0.210</b> | <b>5.66</b> |                             |
|    |             | <b>1.205</b> | <b>0.195</b> | <b>3.24</b> | <b>4.11±0.44/0.98±0.1</b>   |
|    |             | <b>1.210</b> | <b>0.198</b> | <b>3.24</b> |                             |
|    |             | <b>1.203</b> | <b>0.186</b> | <b>4.04</b> |                             |
| 9. | 5LAZ        | 1.199        | 0.218        | 4.04        |                             |

|     |                   |              |              |              |                            |
|-----|-------------------|--------------|--------------|--------------|----------------------------|
|     |                   | 1.203        | 0.215        | 4.04         | 4.20±0.16/1.0±0.03         |
|     |                   | 1.206        | 0.206        | 4.85         |                            |
|     |                   | 1.204        | 0.209        | 4.04         |                            |
|     |                   | 1.205        | 0.208        | 4.04         |                            |
| 10. | <b>WK298_MDM2</b> | <b>1.223</b> | <b>0.188</b> | <b>5.66</b>  |                            |
|     |                   | <b>1.205</b> | <b>0.178</b> | <b>4.85</b>  |                            |
|     |                   | <b>1.215</b> | <b>0.183</b> | <b>4.04.</b> | <b>4.85±0.36/1.15±0.08</b> |
|     |                   | <b>1.217</b> | <b>0.173</b> | <b>5.66</b>  |                            |
|     |                   | <b>1.217</b> | <b>0.198</b> | <b>4.04</b>  |                            |
| 11. | 3LBK              | 1.219        | 0.206        | 4.04         |                            |
|     |                   | 1.219        | 0.186        | 4.04         |                            |
|     |                   | 1.214        | 0.189        | 4.04         | 4.68±0.16/1.11±0.03        |
|     |                   | 1.213        | 0.199        | 3.24         |                            |
|     |                   | 1.213        | 0.184        | 4.04         |                            |
| 12. | <b>4ZYF</b>       | <b>1.216</b> | <b>0.169</b> | <b>5.66</b>  |                            |
|     |                   | <b>1.220</b> | <b>0.159</b> | <b>10.5</b>  |                            |
|     |                   | <b>1.216</b> | <b>0.174</b> | <b>4.04</b>  | <b>5.65±1.25/1.34±0.29</b> |
|     |                   | <b>1.215</b> | <b>0.174</b> | <b>4.04</b>  |                            |
|     |                   | <b>1.213</b> | <b>0.177</b> | <b>4.04</b>  |                            |
| 13. | 5OC8              | 1.227        | 0.186        | 5.66         |                            |
|     |                   | 1.217        | 0.189        | 4.04         |                            |
|     |                   | 1.209        | 0.175        | 4.85         | 4.85±0.36/1.15±0.08        |
|     |                   | 1.227        | 0.180        | 5.66         |                            |
|     |                   | 1.219        | 0.171        | 4.04         |                            |
| 14. | <b>6GGN</b>       | <b>1.213</b> | <b>0.183</b> | <b>4.04</b>  |                            |
|     |                   | <b>1.209</b> | <b>0.186</b> | <b>4.04</b>  |                            |
|     |                   | <b>1.200</b> | <b>0.189</b> | <b>4.04</b>  | <b>4.36±0.32/1.04±0.07</b> |
|     |                   | <b>1.210</b> | <b>0.179</b> | <b>5.66</b>  |                            |
|     |                   | <b>1.205</b> | <b>0.183</b> | <b>4.04</b>  |                            |

S4

**Table 3: The statistical parameter values calculated for dataset**

| Dataset                                                             | Mean Absolute Error | RMSE  | Pearson's Correlation coefficient | Spearman Correlation coefficient | Kendall Tau |
|---------------------------------------------------------------------|---------------------|-------|-----------------------------------|----------------------------------|-------------|
| MDMX-ligand (table 1)                                               | .816                | 1.064 | .860                              | .60                              | .40         |
| MDM2-ligand (table 2, $\Delta G_{\text{calculated}}$ )              | 3.08                | 3.80  | .389                              | .314                             | .297        |
| MDM2-ligand corrected set (table 2, $\Delta G_{\text{corrected}}$ ) | 1.95                | 2.83  | .430                              | .345                             | .297        |

**S5: Scatter Plot for Experimental Binding energy vs Predicted Binding Energy**

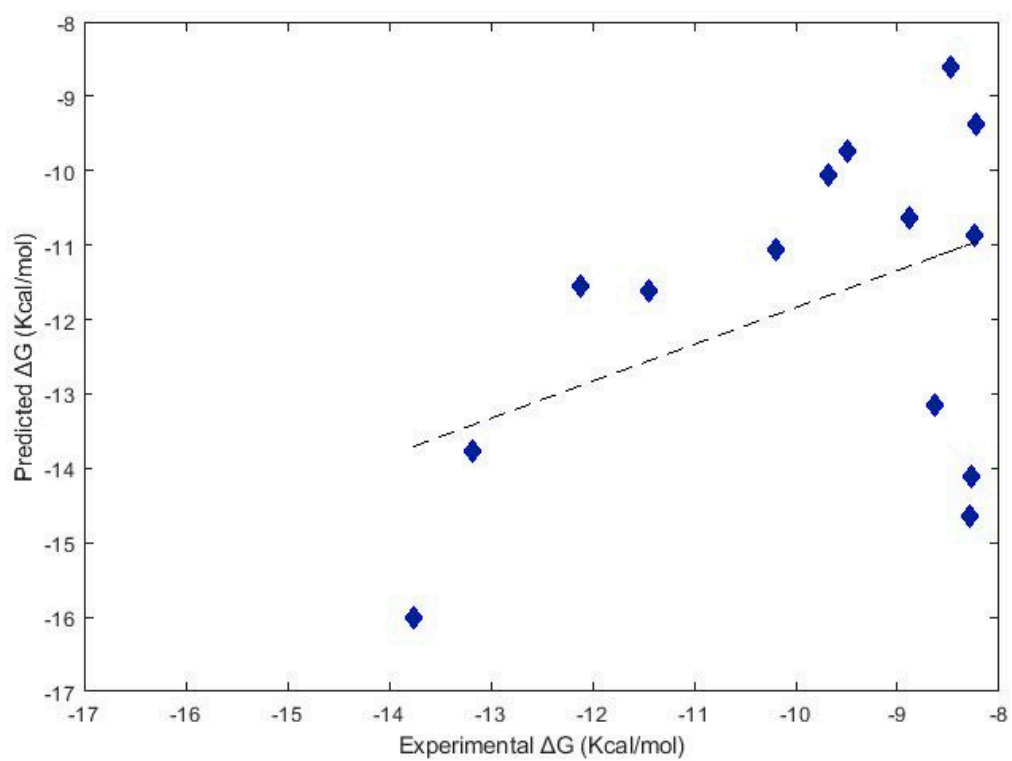

Supplement: ijms-21-04765-s001.pdf [file ijms-21-04765-s001.pdf]
